# Supplementary material
Source: publisher figshare collection journal article supplement (https://acs.figshare.com/ndownloader/files/5501429)
Supplement: Supplementary file 1 [file 5501429]

## Supporting Information

### Using Asphaltene Supermolecules Derived from Coal for the Preparation of Efficient Carbon Electrodes for Supercapacitors

Wen-Hui Qu, Yu-Bo Guo, Wen-Zhong Shen\* and Wen-Cui Li\*

#### Structural Characteristics of Samples and their Raw Materials:

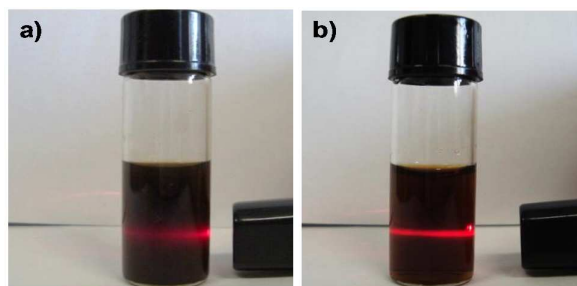

**Figure S1.** (a) Optical images of asphaltene oxide dispersed in tetrahydrofuran and (b) graphene oxide dispersed in water.

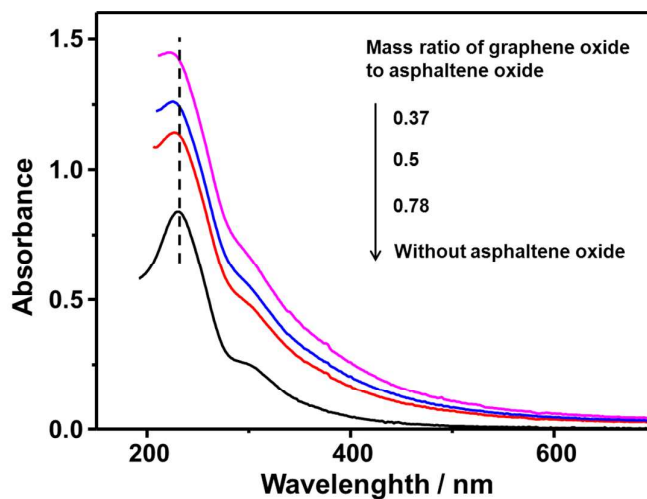

**Figure S2.** UV-vis absorption spectra of graphene oxide and graphene oxide/asphaltene oxide dispersions with different mass ratios of graphene oxide to asphaltene oxide. The concentration of graphene oxide in all dispersions is 0.00144 mg mL<sup>-1</sup>.

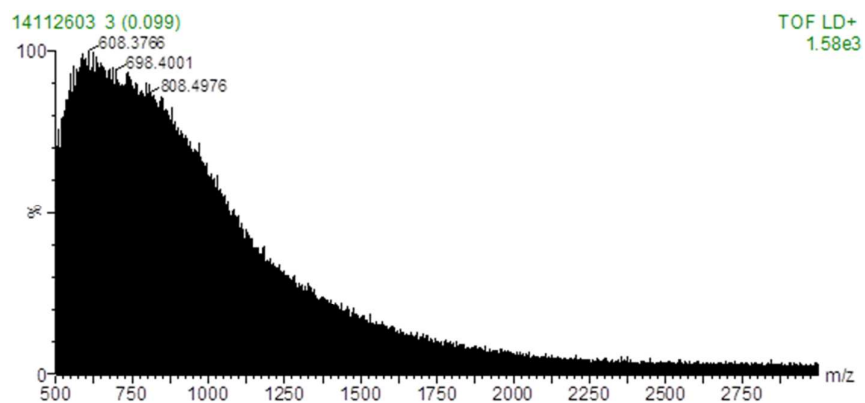

**Figure S3.** MALDI mass spectrum of asphaltene oxide in tetrahydrofuran.

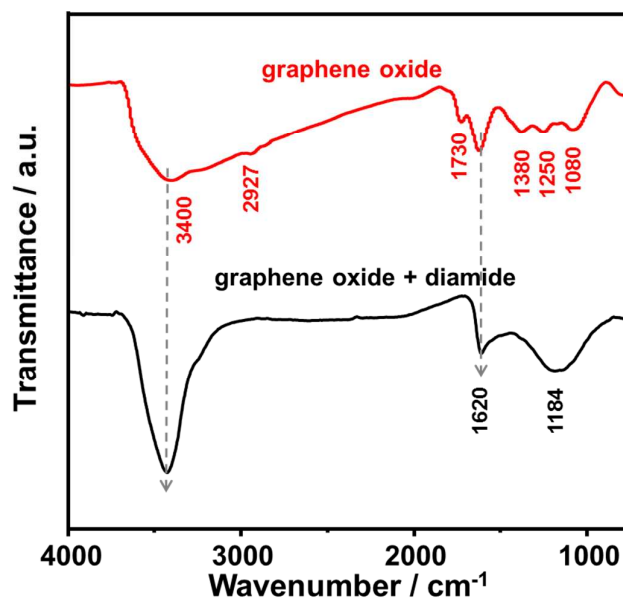

**Figure S4.** FT-IR spectra of graphene oxide and the sample without asphaltene(graphene oxide+diamide).

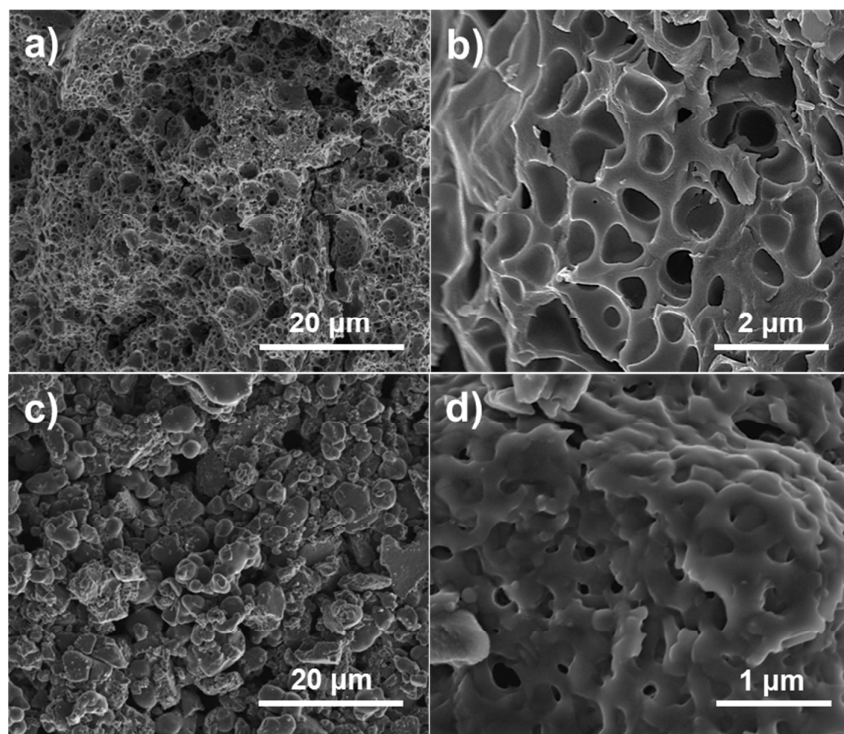

**Figure S5.** SEM images of (a, b) ACN-0.005 and (c, d) ACN-0.

### Electrochemical Performance of the Asphaltene-derived Carbon:

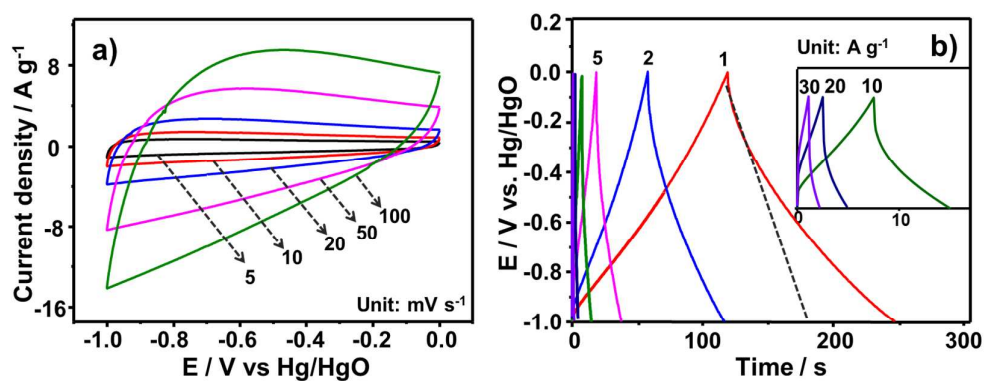

**Figure S6.** (a) CV curves of ACN-0 at scan rates of 5, 10, 20 50 and 100  $\text{mV s}^{-1}$ ; (b) GC curves of ACN-0 at current densities of 1, 2, 5, 10, 20 and 30  $\text{A g}^{-1}$ . Inset is the enlarged GC curves at current densities of 10, 20 and 30  $\text{A g}^{-1}$ .

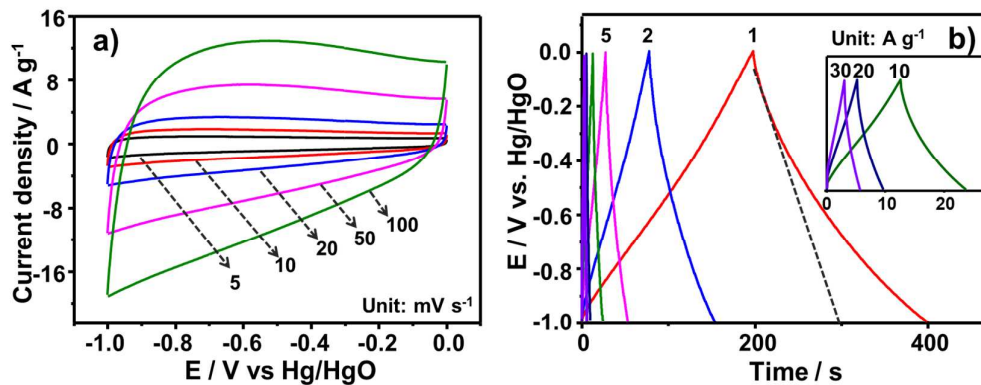

**Figure S7.** (a) CV curves of ACN-0.005 at scan rates of 5, 10, 20 50 and 100 mV s<sup>-1</sup>; (b) GC curves of ACN-0.005 at current densities of 1, 2, 5, 10, 20 and 30 A g<sup>-1</sup>. Inset is the enlarged GC curves at current densities of 10, 20 and 30 A g<sup>-1</sup>.

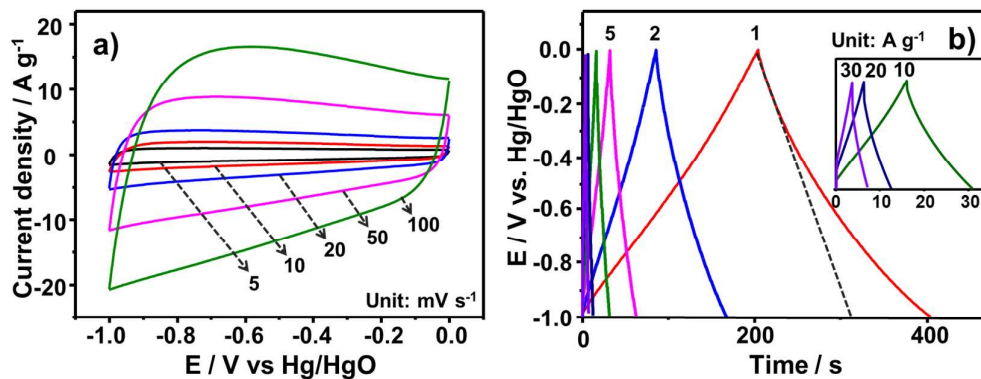

**Figure S8.** (a) CV curves of ACN-0.01 at scan rates of 5, 10, 20 50 and 100 mV s<sup>-1</sup>; (b) GC curves of ACN-0.01 at current densities of 1, 2, 5, 10, 20 and 30 A g<sup>-1</sup>. Inset is the enlarged GC curves at current densities of 10, 20 and 30 A g<sup>-1</sup>.

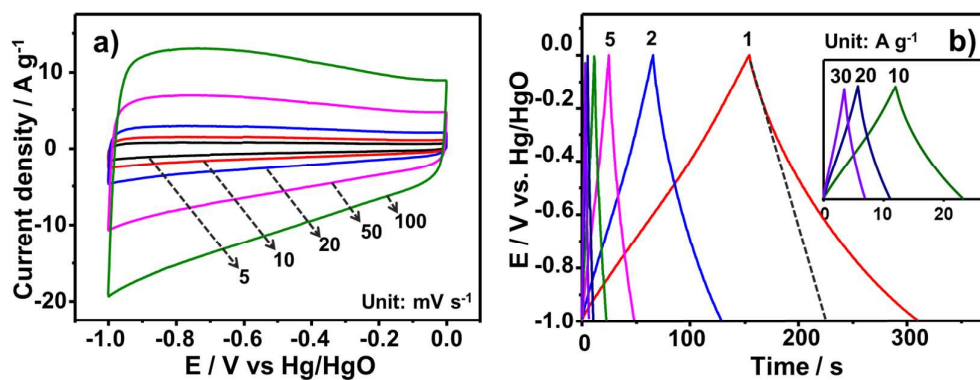

**Figure S9.** (a) CV curves of ACN-0.1 at scan rates of 5, 10, 20 50 and 100  $\text{mV s}^{-1}$ ; (b) GC curves of ACN-0.1 at current densities of 1, 2, 5, 10, 20 and 30  $\text{A g}^{-1}$ . Inset is the enlarged GC curves at current densities of 10, 20 and 30  $\text{A g}^{-1}$ .

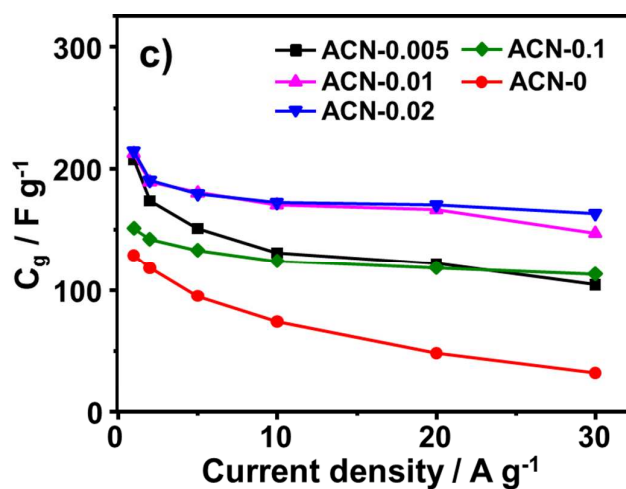

**Figure S10.** Specific gravimetric capacitance of ACNs at various current densities from 1 to 30  $\text{A g}^{-1}$ .

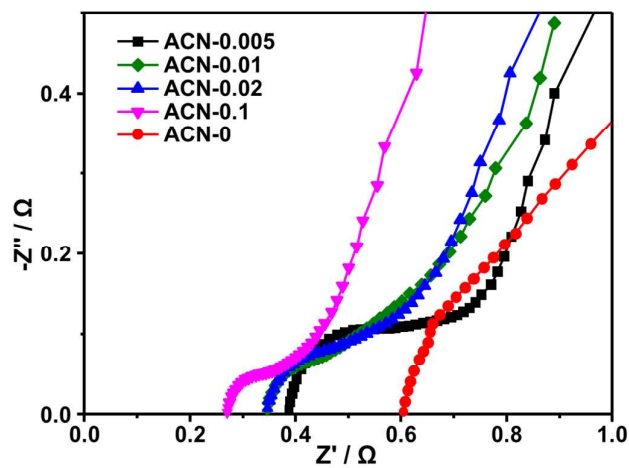

**Figure S11.** Nyquist plots of ACNs in three-electrode system.

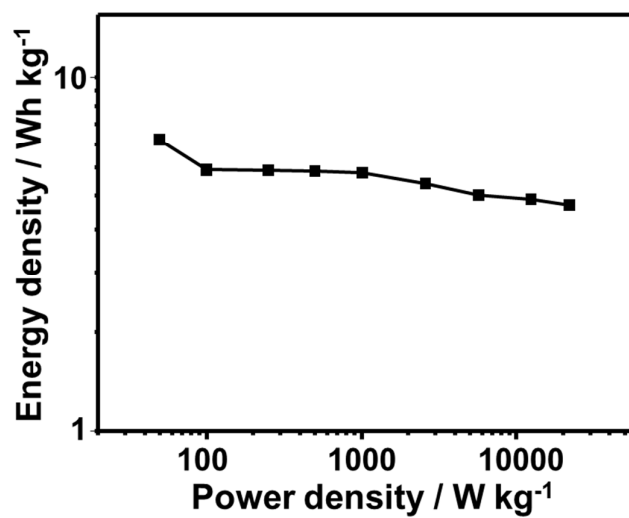

**Figure S12.** Ragone plot of ACN based supercapacitor in term of electrode active material weight.

**Table S1**

The capacitance of reported carbon nanosheet and commercial active carbon electrodes in three-electrode system.

| Material                                        | Electrolyte                         | Capacitance/F g <sup>-1</sup>                           | Ref.                      |
|-------------------------------------------------|-------------------------------------|---------------------------------------------------------|---------------------------|
| Asphaltene derived carbon nanosheet             | 6 M KOH                             | 214 (1 Ag <sup>-1</sup> ), 163 (30 Ag <sup>-1</sup> )   | <a href="#">This work</a> |
| Mesoporous carbon thin films                    | 6 M KOH                             | 136 (0.5 Ag <sup>-1</sup> ), 85 (5 Ag <sup>-1</sup> )   | [1]                       |
| Ionic liquid based Microporous carbon sheet     | 6 M KOH                             | 213 (0.5 Ag <sup>-1</sup> ), 160 (10 Ag <sup>-1</sup> ) | [2]                       |
| Mesoporous carbon/graphite nanosheet            | 6 M KOH                             | 203 (1 Ag <sup>-1</sup> ), 132 (10 Ag <sup>-1</sup> )   | [3]                       |
| Graphene-based macro- and mesoporous frameworks | 1 M H <sub>2</sub> SO <sub>4</sub>  | 226 (1 mVs <sup>-1</sup> ), 83 (100 mVs <sup>-1</sup> ) | [4]                       |
| Graphene oxide assisted carbon sheet            | 5 M KOH                             | 140 (1 Ag <sup>-1</sup> )                               | [5]                       |
| Coal tar pitch based mesoporous carbon sheet    | 1 M Na <sub>2</sub> SO <sub>4</sub> | 276.5 (1 Ag <sup>-1</sup> ), 82 (20 Ag <sup>-1</sup> )  | [6]                       |
| Commercial active carbon (YP50)                 | 6 M KOH                             | 76 (1 mVs <sup>-1</sup> )                               | [7]                       |

## References

- [1] Feng, D.; Lv, Y. Y.; Wu, Z. X.; Dou, Y. Q.; Han, L.; Sun, Z. K.; Xia, Y.; Zheng, G.; Zhao, D. Free-standing Mesoporous Carbon Thin Films with Highly Ordered Pore Architectures for Nanodevices. *J. Am. Chem. Soc.* **2011**, *133*, 15148-15156.
- [2] Jin, Z. Y.; Lu, A. H.; Xu, Y. Y.; Zhang, J. T.; Li, W. C.; Ionic Liquid-assisted Synthesis of Microporous Carbon Nanosheets for Use in High Rate and Long Cycle Life Supercapacitors. *Adv. Mater.* **2014**, *26*, 3700-3705.
- [3] Wang, L.; Mu, G.; Tian, C. G.; Sun, L.; Zhou, W.; Tan, T. X.; Fu, H. In-situ Intercalating Expandable Graphite for Mesoporous Carbon/graphite Nanosheet Composites as High-performance Supercapacitor Electrodes. *ChemSusChem* **2012** *5*, 2442-2450.
- [4] Wu, Z. S.; Sun, Y.; Tan, Y. Z.; Yang, S.; Feng, X.; Mullen, K. Three-dimensional Graphene-based Macro- and Mesoporous Frameworks for High-performance Electrochemical Capacitive Energy Storage. *J. Am. Chem. Soc.* **2012**, *134*, 19532-19535.
- [5] Krishnan, D.; Raidongia, K.; Shao, J. J.; Huang, J. X.; Graphene Oxide Assisted Hydrothermal Carbonization of Carbon Hydrates. *ACS Nano*, **2014** *8*, 449-457.
- [6] Wang, Q.; Yan, J.; Wei, T.; Feng, J.; Ren, Y. M.; Fan, Z. J.; Zhang, M.; Jiang, X. Two-dimensional Mesoporous Carbon Sheet-like Framework Material for High-rate Supercapacitors. *Carbon* **2013**, *60*, 481-487.
- [7] Zheng, C.; Zhou, X.; Cao, H.; Wang, G.; Liu, Z.; Synthesis of Porous Graphene/activated Carbon Composite with High Packing Density and Large Specific Surface Area for Supercapacitor Electrode Material. *J. Power Sources* **2014**, *258*, 290-296.
